# Supplementary material for: Durability and Additional Properties of Anodized Aluminum-Based Coatings with Different Wettability under Natural Conditions
Source: MDPI journal article supplement (doi:10.3390/ma16103729), 2023-05-14
Supplement: s1 [file s1]

Supplementary Materials

# Durability and Additional Properties of Anodized Aluminum-Based Coatings with Different Wettability under Natural Conditions

Klaudia Olkowicz <sup>1\*</sup>, Kamil Kowalczyk <sup>1</sup>, Zofia Buczko <sup>2</sup>, Joanna Czwartos <sup>3</sup> and Barbara Nasiłowska <sup>3</sup>

<sup>1</sup> Aircraft Airworthiness Division, Air Force Institute of Technology, 01-494 Warsaw, Poland; kamil.kowalczyk@itwl.pl

<sup>2</sup> Łukasiewicz—Warsaw Institute of Technologies, 02-673 Warsaw, Poland; zofia.buczko@wit.lukasiewicz.gov.pl

<sup>3</sup> Institute of Optoelectronics, Military University of Technology, 00-908 Warsaw, Poland; joanna.czwartos@wat.edu.pl (J.C.); barbara.nasilowska@wat.edu.pl (B.N.)

\* Correspondence: klaudia.olkowicz@itwl.pl

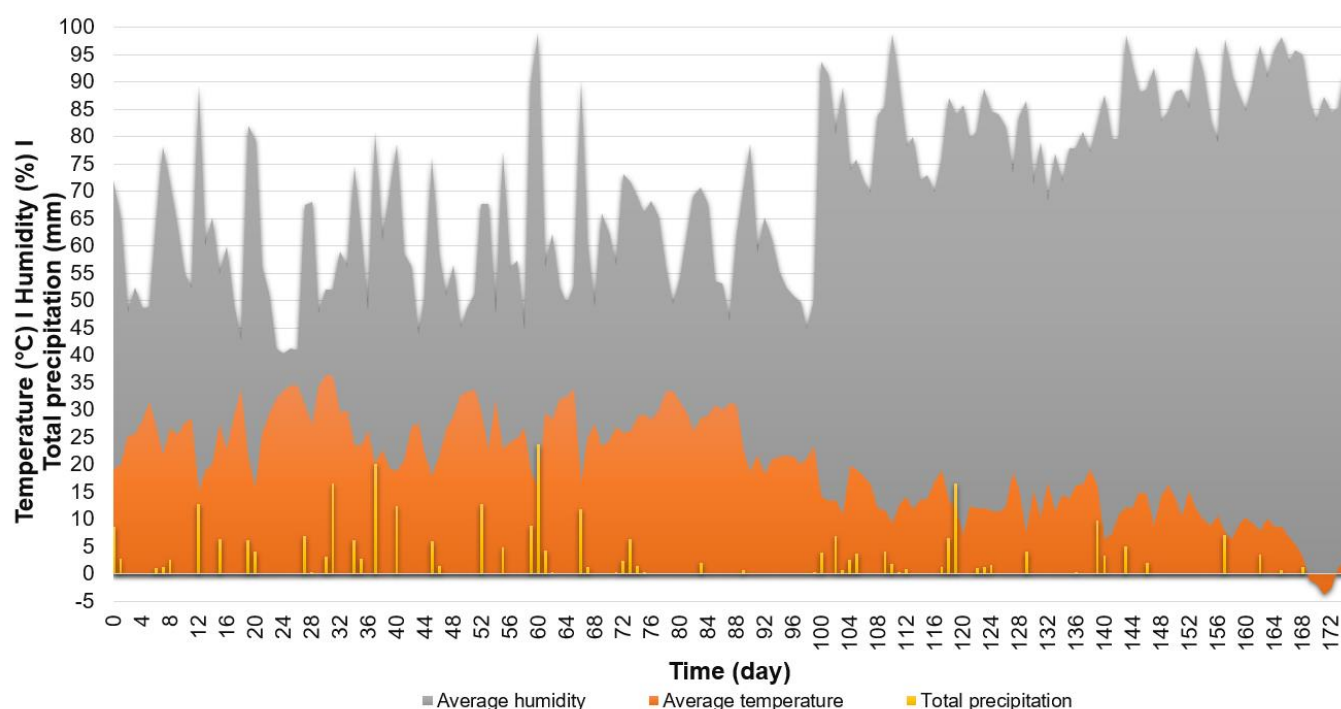

**Figure S1.** The climate in Warsaw during the tests (1 June 2022 - 30 November 2022).

**Table S1.** Durability of the hydrophobic and superhydrophobic coatings from the available literature.

| Type of coating | Test                                             | Changing in the contact angle           | Ref. |
|-----------------|--------------------------------------------------|-----------------------------------------|------|
| ■               | Exposure to natural conditions, 126 days         | From 159.15° to 131.55°                 | [9]  |
|                 | Immersion in seawater, 24 h                      | From 154° to 149° (read from the chart) | [63] |
|                 | Immersion in seawater, 24 h                      | From 154° to 130° (read from the chart) | [63] |
|                 | Immersion in solutions with different pH, 30 min | No drop below 150°                      | [24] |
|                 | Immersion in NaCl solution, 120 h                | From 168.9° to 153°                     | [64] |
|                 | Immersion in acetic acid solution, 144 h         | From 168.9° to 125.3°                   | [64] |
|                 | Immersion in water, 7 days                       | From 159° to 120°                       | [65] |
|                 | Exposure to natural conditions, 12 weeks         | From 159° to 128°                       | [65] |
|                 | Immersion in water, 19 days                      | From 155.2° to 152.4°                   | [19] |
| ◆               | Immersion in water, 7 days                       | From 144° to 137°                       | [26] |
|                 | Exposure to natural conditions, 16 month         | From 168.2° to 152°                     | [66] |
|                 | Exposure to natural conditions, 35 days          | Stable 149° (read from the chart)       | [67] |

■ Coatings similar to specimens from Hydrophobic Series. Coatings based on anodized aluminum and impregnation.

◆ Coatings similar to specimens from Superhydrophobic Series. Coatings based on a combination of SiO<sub>2</sub> particles and silane or similar ingredients.

**Table S2.** Icing delay time of coatings from the available literature.

| Type of coating | Icing Delay Time           | Conditions | Ref. |
|-----------------|----------------------------|------------|------|
| ■               | 192 s (241 s to snowflake) | -8°C       | [68] |
|                 | 179 s (206 s to snowflake) | -8°C       | [68] |
|                 | 900 s                      | -20°C      | [20] |
|                 | 250 s                      | -15°C      | [69] |
| ◆               | 554 s                      | -5°C       | [67] |
|                 | >1404 s                    | -5°C       | [67] |
|                 | 165 s                      | -20°C      | [25] |
|                 | 276.2 s                    | -15°C      | [57] |
|                 | 375 s                      | -20°C      | [44] |

■ Coatings similar to specimens from Hydrophobic Series. Coatings based on anodized aluminum and impregnation.

◆ Coatings similar to specimens from Superhydrophobic Series. Coatings based on a combination of SiO<sub>2</sub> particles and silane or similar ingredients.

**Table S3.** Potentiodynamic polarization parameters for hydrophilic, hydrophobic and superhydrophobic coatings from the available literature.

| Type of coating | Substrate                       |                | Coating                         |                | Contact angle | $\eta_p$ [%] | Ref. |
|-----------------|---------------------------------|----------------|---------------------------------|----------------|---------------|--------------|------|
|                 | $I_{corr}$ [A/cm <sup>2</sup> ] | $E_{corr}$ [V] | $I_{corr}$ [A/cm <sup>2</sup> ] | $E_{corr}$ [V] |               |              |      |
| ●               | $2.72 \times 10^{-5}$           | -1240          | $1.51 \times 10^{-10}$          | -470           | n/a           | 100*         | [50] |
|                 | $6.545 \times 10^{-6}$          | -631.26        | $2.373 \times 10^{-6}$          | -566.74        | n/a           | 63.74*       | [70] |
|                 | $3.136 \times 10^{-6}$          | -658.67        | $0.008 \times 10^{-6}$          | -632.03        | n/a           | 99.74*       | [70] |
|                 | $5.941 \times 10^{-6}$          | -736.54        | $0.726 \times 10^{-6}$          | -726.51        | n/a           | 87.78*       | [70] |
|                 | $4.1 \times 10^{-6}$            | -581           | $0.72 \times 10^{-6}$           | -635           | n/a           | 82.44*       | [71] |
| ■               | $9097 \times 10^{-9}$           | -1135          | $2.26 \times 10^{-9}$           | -328           | 161.5°        | 99.98*       | [24] |
|                 | $8.5 \times 10^{-6}$            | -1682          | $9.8 \times 10^{-9}$            | -1360          | 139°          | 99.9         | [29] |
|                 | $3.060 \times 10^{-7}$          | -629           | $1.527 \times 10^{-9}$          | -570           | 155.2°        | 99.75        | [19] |
|                 | $1.707 \times 10^{-5}$          | -703           | $7.734 \times 10^{-8}$          | -641           | 158°          | 99.5         | [33] |
|                 | curves in article               |                | curves in article               |                | 154°          | 96           | [63] |
|                 | $1.40 \times 10^{-3}$           | -1130          | $5.01 \times 10^{-7}$           | -511           | 167.7°        | 99.96*       | [35] |
|                 | $1.65 \times 10^{-4}$           | -1430          | $2.36 \times 10^{-8}$           | -880           | 170°          | 99.99*       | [72] |
|                 | $5.65 \times 10^{-6}$           | -768.6         | $1.51 \times 10^{-8}$           | -758.3         | 163°          | 99.73*       | [73] |
|                 | $5.65 \times 10^{-6}$           | -768.6         | $6.82 \times 10^{-7}$           | -761.4         | hydrophobic   | 87.93*       | [73] |
|                 | $2.235 \times 10^{-6}$          | -735           | $9.333 \times 10^{-9}$          | -709           | 162°          | 99.58*       | [20] |
|                 | $0.95 \times 10^{-6}$           | -1171          | $0.11 \times 10^{-6}$           | -763           | 93.8°         | 88.4         | [21] |
|                 | $0.95 \times 10^{-6}$           | -1171          | $1.23 \times 10^{-8}$           | -713           | 104.9°        | 98.7         | [21] |
|                 | $3.23 \times 10^{-6}$           | -753           | $4.64 \times 10^{-8}$           | -516           | 167           | 98.6         | [22] |
| ◆               | $6.3 \times 10^{-6}$            | -820           | $2 \times 10^{-7}$              | -130           | 153.2         | 96.8         | [74] |
|                 | $6.98 \times 10^{-5}$           | -1450          | $1.23 \times 10^{-6}$           | -1110          | 153           | 98.24*       | [49] |
|                 | $2.933 \times 10^{-5}$          | -966           | $3.744 \times 10^{-10}$         | -353           | 155           | 99.99        | [75] |
|                 | $7.71 \times 10^{-4}$           | -860           | $2 \times 10^{-9}$              | -500           | 161.35        | 100*         | [76] |
|                 | $2.5 \times 10^{-4}$            | -1020          | $1.4 \times 10^{-11}$           | -180           | 174.5         | 100*         | [77] |
|                 | $6.616 \times 10^{-5}$          | -711           | $1.442 \times 10^{-11}$         | -321           | 157           | 100*         | [78] |

● Coatings similar to specimens from Hydrophilic Series.

■ Coatings similar to specimens from Hydrophobic Series. Coatings based on anodized aluminum and impregnation.

◆ Coatings similar to specimens from Superhydrophobic Series. Coatings based on a combination of SiO<sub>2</sub> particles and silane or similar ingredients.

\* calculated based on literature data:

$$\eta_p = \frac{(I_{corr\ substrate} - I_{corr})}{I_{corr\ substrate}} \cdot 100\%$$

## References

9. Olkowicz, K.; Buczek, Z.; Nasiłowska, B.; Kowalczyk, K.; Czwartos J. Superhydrophobic Coating Based on Porous Aluminum Oxide Modified by Polydimethylsiloxane (PDMS). *Materials* **2022**, *15*, 1042.
19. Zheng, S.; Li, C.; Fu, Q.; Hu, W.; Xiang, T.; Wang, Q.; Du, M.; Liu, X.; Chen, Z. Development of stable superhydrophobic coatings on aluminum surface for corrosion-resistant, self-cleaning, and anti-icing applications. *Materials & Design* **2016**, *93*, 261-270.
20. Zang, J.; Yu, S.; Zhu, G.; Zhou, X. Fabrication of superhydrophobic surface on aluminum alloy 6061 by a facile and effective anodic oxidation method. *Surface and Coatings Technology* **2019**, *380*, 125078.
21. Javanpour, B.; Azadbeh, M.; Mozammel, M. Effect of chemical composition of Tetraethoxysilane and Trimethoxy (propyl) Silane hybrid sol on hydrophobicity and corrosion resistance of anodized aluminum. *Silicon* **2020**, *12*, 867-882.
22. Mao, T.; Li, C.; Mao, F.; Xue, Z.; Xu, G.; Amirfazli, A. A durable anti-corrosion superhydrophobic coating based on carbon nanotubes and SiO<sub>2</sub> aerogel for superior protection for Q235 steel. *Diamond and Related Materials* **2022**, *129*, 109370.
24. Vengatesh, P.; Kulandainathan, M.A. Hierarchically ordered self-lubricating superhydrophobic anodized aluminum surfaces with enhanced corrosion resistance. *ACS applied materials & interfaces* **2015**, *7*, 1516-1526.
25. Zhang, F.; Xu, D.; Zhang, D.; Ma, L.; Wang, J.; Huang, Y.; Chen, M.; Qian, H.; Li, X. A durable and photothermal superhydrophobic coating with entwined CNTs-SiO<sub>2</sub> hybrids for anti-icing applications. *Chemical Engineering Journal* **2021**, *423*, 130238.
26. Amirpoor, S.; Moakhar, R.S.; Dolati, A. A novel superhydrophilic/superoleophobic nanocomposite PDMS-NH<sub>2</sub>/PFONa-SiO<sub>2</sub> coated-mesh for the highly efficient and durable separation of oil and water. *Surface and Coatings Technology* **2020**, *394*, 125859.
29. Jeong, C.; Lee, J.; Sheppard, K.; Choi, C.H. Air-impregnated nanoporous anodic aluminum oxide layers for enhancing the corrosion resistance of aluminum. *Langmuir* **2015**, *31*, 11040-11050.
33. Li, S.; Liu, X.; Li, L.; Zhang, H.; Qiu, C. Drag-reductive and anti-corrosive superhydrophobic surface fabricated on aluminum with thin PDMS/SiO<sub>2</sub> coating. *Materials Research Express* **2019**, *6*, 1065a8.
35. Yin, B.; Fang, L.; Tang, A.Q.; Huang, Q.L.; Hu, J.; Mao, J.H.; Bai, G.; Bai, H. Novel strategy in increasing stability and corrosion resistance for super-hydrophobic coating on aluminum alloy surfaces. *Applied Surface Science* **2011**, *258*, 580-585.
44. Zhang, J.; Liu, S.; Huang, Y.; Lv, Y.; Kong, M.; Li, G. Durable fluorinated-SiO<sub>2</sub>/epoxy superhydrophobic coatings on polycarbonate with strong interfacial adhesion enhanced by solvent-induced crystallization. *Progress in Organic Coatings* **2021**, *150*, 106002.
49. Xie, J.; Hu, J.; Lin, X.; Fang, L.; Wu, F.; Liao, X.; Luo, H.; Shi, L. Robust and anti-corrosive PDMS/SiO<sub>2</sub> superhydrophobic coatings fabricated on magnesium alloys with different-sized SiO<sub>2</sub> nanoparticles. *Applied Surface Science* **2018**, *457*, 870-880.
50. Telmenbayar, L.; Ramu, A.G.; Yang, D.; Song, M.; Erdenebat, T.O.; Choi, D. Corrosion resistance of the anodization/glycidoxypolytrimethoxysilane composite coating on 6061 aluminum alloy. *Surface and Coatings Technology* **2020**, *403*, 126433.
57. Shen, Y.; Wu, Y.; Tao, J.; Zhu, C.; Chen, H.; Wu, Z.; Xie, Y. Spraying fabrication of durable and transparent coatings for anti-icing application: dynamic water repellency, icing delay, and ice adhesion. *ACS applied materials & interfaces* **2018**, *11*, 3590-3598.
63. Yin, Y.; Liu, T.; Chen, S.; Liu, T.; Cheng, S. Structure stability and corrosion inhibition of super-hydrophobic film on aluminum in seawater. *Applied Surface Science* **2008**, *255*, 2978-2984.
64. Lomga, J.; Varshney, P.; Nanda, D.; Satapathy, M.; Mohapatra, S.S.; Kumar, A. Fabrication of durable and regenerable superhydrophobic coatings with excellent self-cleaning and anti-fogging properties for aluminium surfaces. *Journal of Alloys and Compounds* **2017**, *702*, 161-170.
65. Saffari, H.; Sohrabi, B.; Noori, M.R.; Bahrami, H.R.T. Optimal condition for fabricating superhydrophobic Aluminum surfaces with controlled anodizing processes. *Applied Surface Science* **2018**, *435*, 1322-1328.
66. Tan, X.; Wang, Y.; Huang, Z.; Sabin, S.; Xiao, T.; Jiang, L.; Chen, X. Facile Fabrication of a Mechanical, Chemical, Thermal, and Long-Term Outdoor Durable Fluorine-Free Superhydrophobic Coating. *Advanced Materials Interfaces* **2021**, *8*, 2002209.
67. Wang, Z.; Gao, X.; Wen, G.; Tian, P.; Zhong, L.; Gou, X.; Guo, Z. Robust silicon dioxide@ epoxy resin micronanosheet superhydrophobic omnipotent protective coating for applications. *Colloids and Surfaces A: Physicochemical and Engineering Aspects* **2018**, *550*, 9-19.
68. Liu, J.; Zhang, X.; Wang, R.; Long, F.; Zhao, P.; Liu, L. A mosquito-eye-like superhydrophobic coating with super robustness against abrasion. *Materials & Design* **2021**, *203*, 109552.
69. Momen, G.; Farzaneh, M.; Jafari, R. Wettability behaviour of RTV silicone rubber coated on nanostructured aluminium surface. *Applied Surface Science* **2011**, *257*, 6489-6493.
70. Abdel-Gawad, S.A.; Osman, W.M.; Fekry, A.M. Characterization and corrosion behavior of anodized aluminum alloys for military industries applications in artificial seawater. *Surfaces and Interfaces* **2019**, *14*, 314-323.
71. Khan, M.F.; Kumar, A.M.; Ul-Hamid, A.; Al-Hems, L.M. Achieving non-adsorptive anodized film on Al-2024 alloy: Surface and electrochemical corrosion investigation. *Surfaces and Interfaces* **2019**, *15*, 78-88.

- 
72. Wang, G.; Liu, S.; Wei, S.; Liu, Y.; Lian, J.; Jiang, Q. Robust superhydrophobic surface on Al substrate with durability, corrosion resistance and ice-phobicity. *Scientific reports* **2016**, *6*, 1-10.
  73. Zhang, H.; Yin, L.; Shi, S.; Liu, X.; Wang, Y.; Wang, F. Facile and fast fabrication method for mechanically robust superhydrophobic surface on aluminum foil. *Microelectronic Engineering* **2015**, *141*, 238-242.
  74. Shen, Y.; Li, K.; Chen, H.; Wu, Z.; Wang, Z. Superhydrophobic F-SiO<sub>2</sub>@PDMS composite coatings prepared by a two-step spraying method for the interface erosion mechanism and anti-corrosive applications. *Chemical Engineering Journal* **2021**, *413*, 127455.
  75. Tong, W.; Xiong, D.; Zhou, H. TMES-modified SiO<sub>2</sub> matrix non-fluorinated superhydrophobic coating for long-term corrosion resistance of aluminium alloy. *Ceramics International* **2020**, *46*, 1211-1215.
  76. Gong, A.; Zheng, Y.; Yang, Z.; Guo, X.; Gao, Y.; Li, X. Spray fabrication of superhydrophobic coating on aluminum alloy for corrosion mitigation. *Materials Today Communications* **2021**, *26*, 101828.
  77. Zhou, Y.; Ma, Y.; Sun, Y.; Xiong, Z.; Qi, C.; Zhang, Y.; Liu, Y. Robust superhydrophobic surface based on multiple hybrid coatings for application in corrosion protection. *ACS applied materials & interfaces* **2019**, *11*, 6512-6526.
  78. Jin, Z.; Mei, H.; Pan, L.; Liu, H.; Cheng, L. Superhydrophobic self-cleaning hierarchical micro-/nanocomposite coating with high corrosion resistance and durability. *ACS Sustainable Chemistry & Engineering* **2021**, *9*, 4111-4121.
